# Supplementary material
Source: Springer Nature journal article supplement (https://www.springermedizin.de/resource/supplementary/12872_2014_745_MOESM1_ESM.pdf/9430798)
Supplement: MOESM1 [file 9430798]

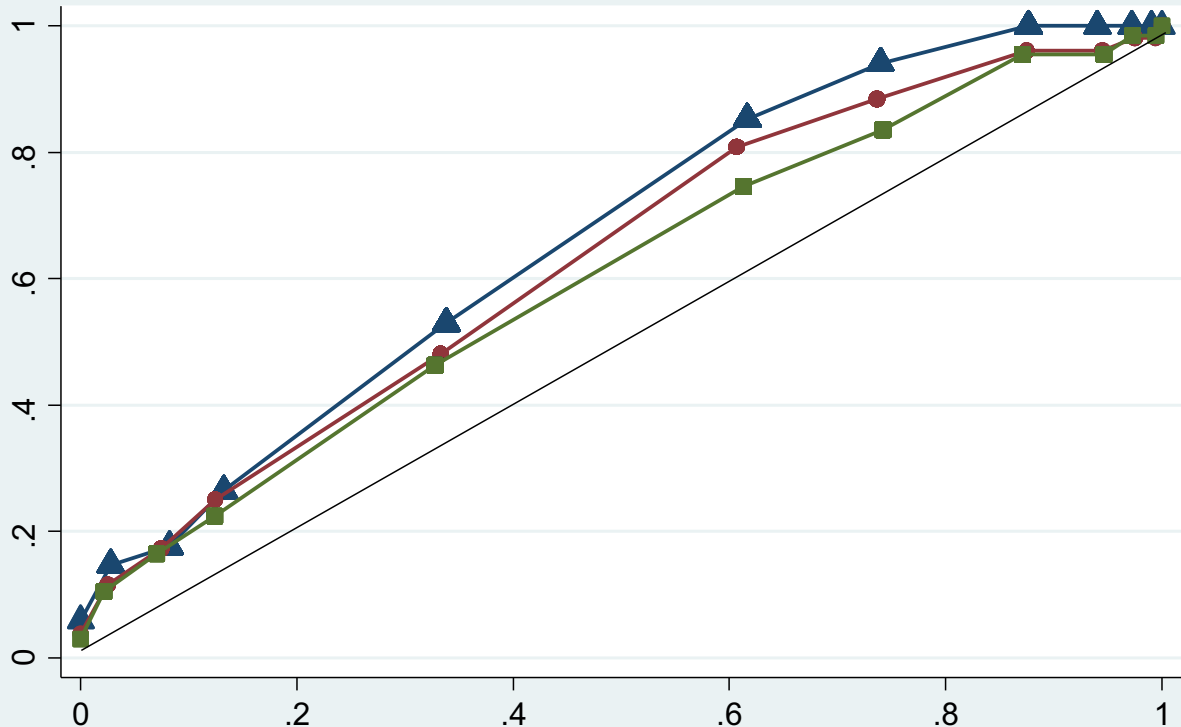

ROC of the LACE index score to predict post discharge ED revisits at 30, 60, and 90 days

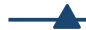

ROC value for lace30

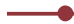

ROC value for lace60

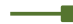

ROC value for lace90
